# Supplementary material
Source: bioRxiv or medRxiv preprint supplement (https://medrxiv.org/highwire/filestream/97416/field_highwire_adjunct_files/0/2020.09.18.20196782-1.pdf)
Supplement: Supplementary file [file 2020.09.18.20196782-1.pdf]

## Supplementary material:

### **Mental health in higher-education students and non-students: evidence from a nationally representative panel study**

Authors: Evangeline Tabor<sup>1\*</sup>, Praveetha Patalay<sup>1,2\*\*</sup>, David Bann<sup>1\*\*</sup>

\*Corresponding author. Email: [evangeline.tabor.18@ucl.ac.uk](mailto:evangeline.tabor.18@ucl.ac.uk)

\*\*Contributed equally.

<sup>1</sup>Institute of Social Research, University College London, London, UK

<sup>2</sup>Faculty of Population Health Sciences, University College London, London, UK

## **Methods**

Highest parental educational qualification was derived by sourcing the earliest educational qualification available for each of the respondents' parents across the nine waves. The parent with the highest qualification was selected and used to provide the highest parental educational qualification. Where no parent qualification was available, self-reported parental education was used. Highest parental educational qualification was categorized into the following categories: Degree or equivalent, A levels or equivalent, GCSE or equivalent, No qualification, Other. When deciding the highest qualification, Other is listed where applicable except where a respondent also has a parent who has a degree or equivalent.

Ethnicity is a derived category with eighteen categories. In this analysis ethnicity was recategorized into six categories: White British, Other White, Mixed, Asian, Black, and Other.

GHQ questions include: "Have you recently been feeling unhappy or depressed?" and "Have you recently felt constantly under strain?", with response options including "Not at all", "No more than usual", "Rather more than usual" and "Much more than usual".

Table S1: Sample size and descriptive statistics for each Understanding Society wave and the pooled analysis.

|                                                | 2010-11 | 2011-13 | 2012-14 | 2013-15 | 2014-16 | 2015-17 | 2016-18 | 2017-19 | Pooled |
|------------------------------------------------|---------|---------|---------|---------|---------|---------|---------|---------|--------|
| Sample (N)                                     | 4404    | 4191    | 3944    | 3902    | 4283    | 3854    | 3638    | 3277    | 11,519 |
| Higher Education group (%)                     | 42.1    | 42.5    | 44.2    | 47.4    | 48.5    | 48.1    | 48.1    | 48.1    | 43.9   |
| Female (%)                                     | 55.5    | 54.9    | 53.0    | 52.9    | 52.7    | 52.8    | 53.3    | 54.0    | 52.4   |
| Mean age                                       | 20.1    | 20.1    | 20.0    | 20.1    | 20.2    | 20.3    | 20.3    | 20.3    | 19.8   |
| White British (%)                              | 77.3    | 75.4    | 75.4    | 75.2    | 65.7    | 66.8    | 68.1    | 69.2    | 68.5   |
| Highest parental educational qualification (%) |         |         |         |         |         |         |         |         |        |
| Degree or higher                               | 35.3    | 39.3    | 41.1    | 43.4    | 43.2    | 44.4    | 45.7    | 48.2    | 40.6   |
| A level or eqv.                                | 22.3    | 21.3    | 21.0    | 20.2    | 19.2    | 19.7    | 19.5    | 18.4    | 20.4   |
| GCSE or eqv.                                   | 23.9    | 21.4    | 20.9    | 20.1    | 20.9    | 19.8    | 19.6    | 20.6    | 21.6   |
| No qual.                                       | 11.6    | 11.5    | 10.1    | 9.3     | 9.7     | 9.0     | 8.4     | 6.4     | 10.4   |
| Other                                          | 6.9     | 6.6     | 6.9     | 7.1     | 6.9     | 7.1     | 6.8     | 6.4     | 6.9    |

Table S2: Sample size and descriptive statistics for higher education (HE) and non-higher education (non-HE) groups. Results are weighted means and percentages. p-Values are from chi square tests and t-tests.

|                                                | 2010-2011 |        |         | 2011-2013 |        |         | 2012-2014 |        |         | 2013-2015 |             |         |
|------------------------------------------------|-----------|--------|---------|-----------|--------|---------|-----------|--------|---------|-----------|-------------|---------|
|                                                | HE        | Non-HE | p-value | HE        | Non-HE | p-value | HE        | Non-HE | p-value | Student   | Non-student | p-value |
| Sample (N)                                     | 1,852     | 2,552  | -       | 1,780     | 2,411  | -       | 1,745     | 2,199  | -       | 1,848     | 2,054       | -       |
| Mean age                                       | 20.3      | 19.9   | <0.001  | 20.4      | 19.8   | <0.001  | 20.4      | 19.7   | <0.001  | 20.4      | 19.8        | <0.001  |
| Female (%)                                     | 56.0      | 55.1   | -       | 55.5      | 54.5   | -       | 55.1      | 51.3   | <0.05   | 53.3      | 52.5        | -       |
| White Brit. (%)                                | 71.2      | 81.7   | <0.001  | 71.8      | 78.1   | <0.001  | 71.7      | 78.4   | <0.001  | 71.4      | 78.6        | <0.001  |
| Highest parental educational qualification (%) |           |        |         |           |        |         |           |        |         |           |             |         |
| Degree or higher                               | 43.0      | 29.7   |         | 48.1      | 32.8   |         | 49        | 34.8   |         | 50.9      | 36.7        |         |
| A level or eqv.                                | 21.4      | 23.0   |         | 20.1      | 22.2   |         | 19.0      | 22.6   |         | 18.3      | 21.9        |         |
| GCSE or eqv.                                   | 19.5      | 27.2   | <0.001  | 17.2      | 24.4   | <0.001  | 18.0      | 23.2   | <0.001  | 17.4      | 22.5        | <0.001  |
| No qual.                                       | 10.3      | 12.6   |         | 9.5       | 12.8   |         | 7.9       | 11.9   |         | 7.0       | 11.3        |         |
| Other                                          | 5.8       | 7.6    |         | 5.0       | 7.8    |         | 6.1       | 7.6    |         | 6.4       | 7.7         |         |
|                                                | 2014-16   |        |         | 2015-17   |        |         | 2016-18   |        |         | 2017-19   |             |         |
|                                                | HE        | Non-HE | p-value | HE        | Non-HE | p-value | HE        | Non-HE | p-value | HE        | Non-HE      | p-value |
| Sample (N)                                     | 2,079     | 2,204  | -       | 1,852     | 2,002  | -       | 1,748     | 1,890  | -       | 1,576     | 1,576       | -       |
| Mean age                                       | 20.6      | 19.8   | <0.001  | 20.7      | 19.9   | <0.001  | 20.7      | 19.9   | <0.001  | 20.8      | 19.84       | <0.001  |
| Female (%)                                     | 54.1      | 51.4   | -       | 54.7      | 51.1   | <0.05   | 55.4      | 51.4   | <0.05   | 54.4      | 53.5        | -       |
| White Brit. (%)                                | 60.4      | 70.6   | <0.001  | 62.0      | 71.2   | <0.001  | 63.2      | 72.7   | <0.001  | 64.6      | 73.4        | <0.001  |
| Highest parental educational qualification (%) |           |        |         |           |        |         |           |        |         |           |             |         |
| Degree or higher                               | 50.2      | 36.7   |         | 51.2      | 38.1   |         | 53.1      | 38.9   |         | 55.0      | 42.0        |         |
| A level or eqv.                                | 18.6      | 19.8   |         | 18.9      | 20.4   |         | 18.7      | 20.4   |         | 17.2      | 19.6        |         |
| GCSE or eqv.                                   | 17.1      | 24.4   | <0.001  | 23.0      | 23.0   | <0.001  | 15.9      | 9.7    | <0.001  | 16.8      | 24.1        | <0.001  |
| No qual.                                       | 8.1       | 11.3   |         | 10.2      | 10.2   |         | 6.9       | 7.9    |         | 5.8       | 6.9         |         |
| Other                                          | 6.0       | 7.9    |         | 5.7       | 8.3    |         | 5.5       | 7.9    |         | 5.3       | 7.4         |         |

Table S3: Parameter estimates of higher education status on psychological distress (GHQ score).

|                                    | 2010-11                                 | 2011-13                                 | 2012-14                                 | 2013-15                                 | 2014-16                                 | 2015-17                                 | 2016-18                                 | 2017-19                                 | Pooled                                  |
|------------------------------------|-----------------------------------------|-----------------------------------------|-----------------------------------------|-----------------------------------------|-----------------------------------------|-----------------------------------------|-----------------------------------------|-----------------------------------------|-----------------------------------------|
|                                    | $\beta$<br>(low 95% CI,<br>high 95% CI) | $\beta$<br>(low 95% CI,<br>high 95% CI) | $\beta$<br>(low 95% CI,<br>high 95% CI) | $\beta$<br>(low 95% CI,<br>high 95% CI) | $\beta$<br>(low 95% CI,<br>high 95% CI) | $\beta$<br>(low 95% CI,<br>high 95% CI) | $\beta$<br>(low 95% CI,<br>high 95% CI) | $\beta$<br>(low 95% CI,<br>high 95% CI) | $\beta$<br>(low 95% CI,<br>high 95% CI) |
| HE vs non-HE (ref category)        |                                         |                                         |                                         |                                         |                                         |                                         |                                         |                                         |                                         |
| Unadjusted                         | -0.39<br>(-0.81, 0.04)                  | -0.09<br>(-0.54, 0.37)                  | 0.24<br>(-0.28, 0.75)                   | -0.38<br>(-0.86, 0.10)                  | -0.15<br>(-0.69, 0.40)                  | -0.43<br>(-0.98, 0.13)                  | -0.14<br>(-0.78, 0.49)                  | -0.29<br>(-0.92, 0.36)                  | -0.36*<br>(-0.65, -0.08)                |
| Adjusted <sup>a</sup>              | -0.52*<br>(-0.94, -0.10)                | -0.20<br>(-0.65, 0.25)                  | 0.05<br>(-0.48, 0.57)                   | -0.35<br>(-0.84, 0.13)                  | -0.38<br>(-0.92, 0.16)                  | -0.58*<br>(-1.11, -0.04)                | -0.32<br>(-0.94, 0.30)                  | -0.32<br>(-0.97, 0.34)                  | -0.37*<br>(-0.66, -0.08)                |
| Male HE vs non-HE (ref category)   |                                         |                                         |                                         |                                         |                                         |                                         |                                         |                                         |                                         |
| Adjusted <sup>a</sup>              | -0.31<br>(-0.90, 0.27)                  | 0.15<br>(-0.45, 0.74)                   | 0.08<br>(-0.63, 0.80)                   | -0.08<br>(-0.77, 0.62)                  | -0.27*<br>(-1.00, 0.46)                 | -0.21<br>(-0.91, 0.49)                  | -0.02<br>(-0.87, 0.82)                  | -0.67<br>(-1.68, 0.33)                  | -0.27<br>(-0.65, 0.10)                  |
| Female HE vs non-HE (ref category) |                                         |                                         |                                         |                                         |                                         |                                         |                                         |                                         |                                         |
| Adjusted <sup>a</sup>              | -0.67*<br>(-1.30, -0.05)                | -0.54<br>(-1.26, 0.19)                  | 0.02<br>(-0.71, 0.75)                   | -0.68<br>(-1.43, 0.07)                  | -0.53*<br>(-1.42, 0.36)                 | -0.94*<br>(-1.73, -0.15)                | -0.62<br>(-1.48, 0.23)                  | 0.19<br>(-0.78, 1.15)                   | -0.44<br>(-0.89, 0.01)                  |

a. adjusted for age, sex, ethnicity and parental education in all models and additionally for study year in the pooled analysis.

The non-higher education group is the reference category (\* indicates p-value is <0.05)

Table S4: Odds ratios of higher education status on psychological distress caseness

|                                    | 2010-11                                    | 2011-13                                    | 2012-14                                    | 2013-15                                    | 2014-16                                    | 2015-17                                    | 2016-18                                    | 2017-19                                    | Pooled                                     |
|------------------------------------|--------------------------------------------|--------------------------------------------|--------------------------------------------|--------------------------------------------|--------------------------------------------|--------------------------------------------|--------------------------------------------|--------------------------------------------|--------------------------------------------|
|                                    | Odds ratio<br>(low 95% CI,<br>high 95% CI) | Odds ratio<br>(low 95% CI,<br>high 95% CI) | Odds ratio<br>(low 95% CI,<br>high 95% CI) | Odds ratio<br>(low 95% CI,<br>high 95% CI) | Odds ratio<br>(low 95% CI,<br>high 95% CI) | Odds ratio<br>(low 95% CI,<br>high 95% CI) | Odds ratio<br>(low 95% CI,<br>high 95% CI) | Odds ratio<br>(low 95% CI,<br>high 95% CI) | Odds ratio<br>(low 95% CI,<br>high 95% CI) |
| HE vs non-HE (ref category)        |                                            |                                            |                                            |                                            |                                            |                                            |                                            |                                            |                                            |
| Unadjusted                         | 0.92<br>(0.76, 1.11)                       | 0.92<br>(0.78, 1.09)                       | 1.10<br>(0.92, 1.32)                       | 0.83*<br>(0.69, 1.00)                      | 0.93*<br>(0.76, 1.14)                      | 0.91*<br>(0.74, 1.13)                      | 0.99<br>(0.81, 1.22)                       | 0.88<br>(0.70, 1.11)                       | 0.91<br>(0.81, 1.02)                       |
| Adjusted <sup>a</sup>              | 0.88<br>(0.73, 1.07)                       | 0.89<br>(0.75, 1.06)                       | 1.04<br>(0.86, 1.25)                       | 0.83*<br>(0.69, 1.00)                      | 0.87<br>(0.69, 1.08)                       | 0.86<br>(0.69, 1.07)                       | 0.90<br>(0.73, 1.12)                       | 0.84<br>(0.66, 1.07)                       | 0.91<br>(0.81, 1.02)                       |
| Male HE vs non-HE (ref category)   |                                            |                                            |                                            |                                            |                                            |                                            |                                            |                                            |                                            |
| Adjusted <sup>a</sup>              | 0.89<br>(0.65, 1.23)                       | 1.01<br>(0.77, 1.32)                       | 1.15<br>(0.85, 1.55)                       | 0.82<br>(0.61, 1.09)                       | 0.89<br>(0.62, 1.27)                       | 0.98<br>(0.68, 1.39)                       | 1.00<br>(0.74, 1.41)                       | 0.76<br>(0.51, 1.13)                       | 0.92<br>(0.77, 1.09)                       |
| Female HE vs non-HE (ref category) |                                            |                                            |                                            |                                            |                                            |                                            |                                            |                                            |                                            |
| Adjusted <sup>a</sup>              | 0.88<br>(0.68, 1.14)                       | 0.80<br>(0.62, 1.04)                       | 0.95<br>(0.73, 1.23)                       | 0.83<br>(0.64, 1.08)                       | 0.83<br>(0.63, 1.11)                       | 0.76<br>(0.57, 1.02)                       | 0.82<br>(0.62, 1.08)                       | 1.00<br>(0.72, 1.38)                       | 0.90<br>(0.77, 1.06)                       |

a. adjusted for age, sex, ethnicity and parental education in all models and additionally for study year in the pooled analysis.

The non-higher education group is the reference category (\* indicates p-value is <0.05.)
